# Supplementary material for: Pd/meso-CoO derived from in situ reduction of the one-step synthesized Pd/meso-Co3O4: high-performance catalysts for benzene combustion
Source: Royal Society of Chemistry journal article supplement (doi:10.1039/c9nj03039e), 2019-01-01
Supplement: c9nj03039e1.pdf [file c9nj03039e1.pdf]

Electronic supplementary information (ESI) for New Journal of Chemistry.

This journal is © The Royal Society of Chemistry 2019

**Pd/meso-CoO derived from in situ reduction of the one-step synthesized  
Pd/meso-Co<sub>3</sub>O<sub>4</sub>: High-performance catalysts for benzene combustion**

Xingtian Zhao<sup>a</sup>, Ran Zhang<sup>b</sup>, Yuxi Liu<sup>a</sup>, Jiguang Deng<sup>a</sup>, Peng Xu<sup>a,c</sup>, Sijie Lv<sup>a</sup>, Shuang Li<sup>a</sup>,  
Wenbo Pei<sup>a</sup>, Kunfeng Zhang<sup>a</sup> and Hongxing Dai<sup>\*a</sup>

<sup>a</sup> *Beijing Key Laboratory for Green Catalysis and Separation, Key Laboratory of Beijing on Regional Air Pollution Control, Key Laboratory of Advanced Functional Materials, Education Ministry of China, Laboratory of Catalysis Chemistry and Nanoscience, Department of Chemistry and Chemical Engineering, College of Environmental and Energy Engineering, Beijing University of Technology, Beijing 100124, China. E-mail: hxdai@bjut.edu.cn*

<sup>b</sup> *Petrochina Petrochemical Research Institute, Beijing 102206, China.*

<sup>c</sup> *CAS Key Laboratory of Standardization and Measurement for Nanotechnology, National Center for Nanoscience and Technology, Beijing 100190, China.*

## Content

| Item                                           | Page |
|------------------------------------------------|------|
| <b>Catalyst characterization procedures</b>    | 3–5  |
| <b>Catalyst activity evaluation procedures</b> | 5–6  |
| <b>Fig. S1</b>                                 | 6    |
| <b>Fig. S2</b>                                 | 7    |
| <b>Fig. S3</b>                                 | 8    |
| <b>Fig. S4</b>                                 | 9    |
| <b>Fig. S5</b>                                 | 10   |
| <b>Fig. S6</b>                                 | 11   |
| <b>Fig. S7</b>                                 | 12   |
| <b>Table S1</b>                                | 13   |
| <b>Table S2</b>                                | 14   |

## Catalyst characterization procedures:

Elemental analyses of the noble metal loadings were performed using the inductively coupled plasma–atomic emission spectroscopic (ICP–AES) technique on a Thermo Electron IRIS Intrepid ER/S spectrometer. X-ray diffraction (XRD) patterns of the samples were recorded on a Bruker D8 Advance diffractometer using the Cu K $\alpha$  radiation and nickel filter, with a scanning speed of 1 °/min in the  $2\theta$  range of 0.5–10° and a scanning speed of 8° min<sup>-1</sup> in the  $2\theta$  range of 10–85°. Transmission electron microscopic (TEM) images of the samples were obtained using the JEOL-2010 equipment (operating at 200 kV). High-angle annular dark field–scanning transmission electron microscopic (HAADF–STEM) and energy-dispersive X-ray spectroscopic (EDX) techniques were used to acquire the HAADF–STEM and element mapping images of the typical samples on the equipment FEI G2 80–200/ChemSTEM with a probe corrector. The TEM and HAADF–STEM/EDX analyses on the samples were carried out by dispersing the sample powders in ethanol and depositing them on a copper grid.

Surface area measurements were carried out on a Micromeritics ASAP 2020 instrument via N<sub>2</sub> adsorption at –196 °C. Before the measurement, each sample was degassed at 250 °C for 3 h. Surface areas and pore-size distributions of the samples were calculated by the Brunauer–Emmett–Teller (BET) and Barrett–Joyner–Halenda (BJH) methods, respectively. X-ray photoelectron spectroscopy (XPS) was used to measure the Co 2p, O 1s, Pd 3d, and C 1s binding energies (BEs) of the surface species on the samples using a Thermo Fisher Scientific ESCALAB 250 Xi spectrometer equipped with the Mg K $\alpha$  X-ray source ( $h\nu = 1253.6$  eV). The samples were degassed in the preparation chamber (10<sup>-5</sup> Torr) for 0.5 h and then introduced into the analysis chamber (3 × 10<sup>-9</sup> Torr) for XPS spectrum recording. All of the signals were referenced to the BE (284.6 eV) of C 1s for calibration. Raman spectra of the

samples were recorded with a visible (532 nm) laser excitation on a Horiba-Jobin Yvon Laboratory Ram-HR Raman spectrometer with a confocal microscope and a notch filter (Kaiser Super Notch). The scattered photons were directed into a single monochromator and focused onto a UV-sensitive liquid N<sub>2</sub>-cooled CCD detector (Horiba-Jobin Yvon CCD-3000V) with a spectral resolution of 1 cm<sup>-1</sup>.

Hydrogen temperature-programmed reduction (H<sub>2</sub>-TPR) experiments were carried out on a chemical adsorption analyzer (Autochem II 2920, Micromeritics) equipped with a thermal conductivity detector (TCD). Before H<sub>2</sub>-TPR experiment, ca. 30 mg of the sample was loaded to a quartz fixed-bed U-shaped microreactor. The sample was first pretreated in an air or He flow of 30 mL min<sup>-1</sup> at 300 °C for 1 h and cooled to RT at the same atmosphere. H<sub>2</sub>-TPR profile of each sample was recorded when the sample was heated at a ramp of 10 °C min<sup>-1</sup> in a mixture of 10 vol% H<sub>2</sub>/90 vol% Ar (30 mL min<sup>-1</sup>) from RT to 800 °C. The alteration in H<sub>2</sub> concentration of the effluent was monitored online by a TCD. The reduction peak was calibrated against that of the complete reduction of a known standard powered CuO (Aldrich, 99.995 %). Oxygen temperature-programmed reduction (O<sub>2</sub>-TPD) experiments were conducted on the apparatus same as that used in the H<sub>2</sub>-TPR experiments, and the samples were preheated using the same experimental conditions. After cooling to RT, an O<sub>2</sub> flow of 20 mL min<sup>-1</sup> was introduced into the U-shaped microreactor for 1 h. Then, the sample was purged in a He flow of 30 mL min<sup>-1</sup> for 1 h. O<sub>2</sub>-TPD profile of each sample was recorded when the sample was heated at a ramp of 10 °C min<sup>-1</sup> in a He flow of 30 mL min<sup>-1</sup> from RT to 900 °C. The desorption amounts of oxygen were calculated according to the amount of an oxygen pulse monitored by a TCD.

*In situ* diffuse reflectance Fourier transform infrared spectroscopic (DRIFTS) experiments were performed on a Bruker FT-IR spectrometer (SENSOR II) equipped with a liquid nitrogen-cooling mercury-cadmium-telluride (MCT) detector. 30 mg of the sample was

placed in a high-temperature IR cell with a ZnSe window (Pike Technologies), and heated in a N<sub>2</sub> flow of 20 mL min<sup>-1</sup> at 300 °C for 30 min to remove the adsorbed water and CO<sub>2</sub>. During the temperature-cooling process, the background was collected in N<sub>2</sub> at different temperatures. Finally, the temperature was cooled to 150 °C. Afterward, a 1000 ppm benzene (N<sub>2</sub> as balance) flow of 10 mL min<sup>-1</sup> was passed through the samples at 150 °C. Subsequently, gaseous and physisorbed benzene was purged by flushing N<sub>2</sub> for 30 min, and the temperature was increased in N<sub>2</sub> or 20 vol% O<sub>2</sub> (N<sub>2</sub> as balance) to 300 °C. The DRIFTS spectra in the range of 650–4000 cm<sup>-1</sup> (with 32 scans at a resolution of 4 cm<sup>-1</sup>) of the samples were recorded at different time and temperatures. In the other experiments, a mixture of 1000 ppm benzene + 20 vol% O<sub>2</sub> + N<sub>2</sub> was introduced to the sample at 150 °C, and the temperature was increased in the same atmosphere to 300 °C.

### **Catalytic activity evaluation procedures:**

Catalytic activities of the samples were evaluated in a continuous-flow fixed-bed quartz tubular microreactor (i.d. = 6.0 mm). A thermocouple was inserted inside the catalyst bed (0.5 g of the catalyst (40–60 mesh) diluted with 1.5 g of quartz sand (40–60 mesh)) to measure the reaction temperatures. Before activity measurement, the samples were pretreated in a N<sub>2</sub> flow of 20 mL min<sup>-1</sup> at 250 °C for 30 min. The 1000-ppm benzene gas was produced by a N<sub>2</sub> flow bubbling through a saturator filled with liquid benzene at 6 °C. A gas mixture composed of 1000 ppm benzene + 20 vol% O<sub>2</sub> + N<sub>2</sub> (balance) was fed into the microreactor with a total flow rate of 33.3 mL min<sup>-1</sup>, equivalent to a space velocity (SV) of ca. 40 000 mL (g h)<sup>-1</sup>. In the case of H<sub>2</sub>O addition, 3.0 and 5.0 vol% H<sub>2</sub>O was introduced by passing a N<sub>2</sub> flow of 19.2 mL min<sup>-1</sup> through a water saturator at 34 and 43 °C, respectively. In the case of CO<sub>2</sub> introduction, 5.0 vol% CO<sub>2</sub> was introduced from a 30 vol% CO<sub>2</sub> (N<sub>2</sub> as balance) cylinder. The activity data were collected after steady operation at a given temperature for 30 min. The

reactants and products were online analyzed using Shimadzu GC-14C equipped with a flame ionization detector (Stabilwax column, 30 m in length) and a TCD (Porapak-Q column, 5 m in length). Benzene conversion ( $X$ ) was calculated according to the equation:  $X = ([C_6H_6]_{in} - [C_6H_6]_{out})/[C_6H_6]_{in} \times 100 \%$ , where  $[C_6H_6]_{in}$  and  $[C_6H_6]_{out}$  were the inlet and outlet benzene concentrations, respectively.  $CO_2$  yield ( $Y$ ) was estimated according to the formula:  $Y = ([CO_2]_{out}/([C_6H_6]_{in} \times 6)) \times 100 \%$ , where  $[CO_2]_{out}$  was the effluent  $CO_2$  concentration.

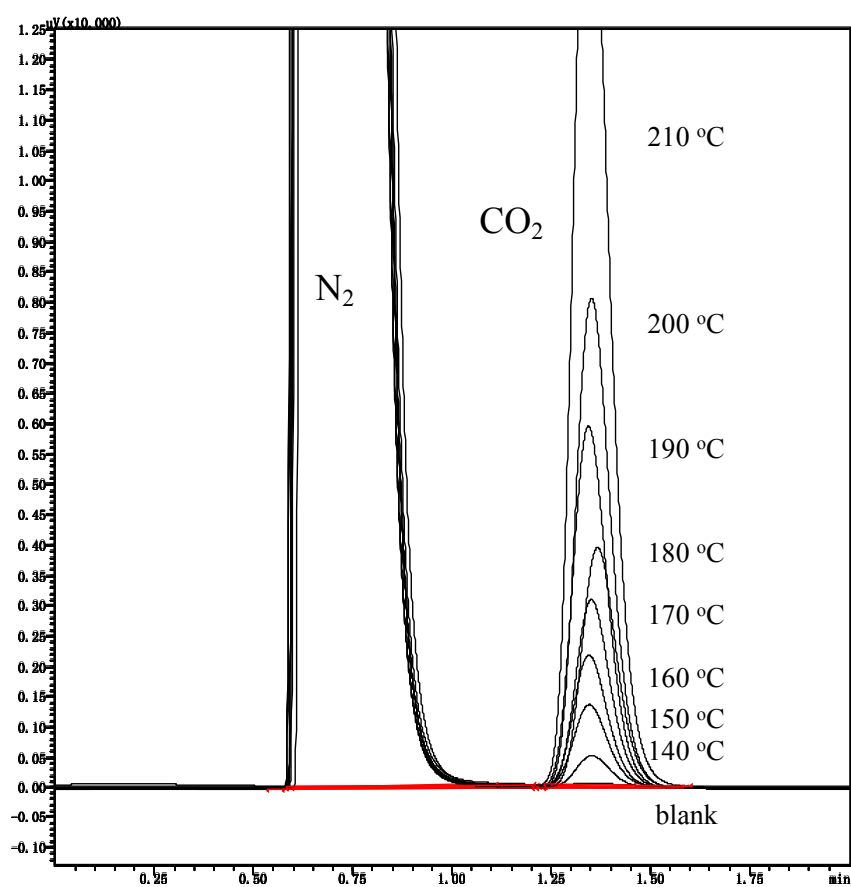

**Fig. S1** GC spectra of  $CO_2$  formed during the benzene oxidation processes over  $0.85Pd/meso-Co_3O_4$  at  $SV = 40\ 000\ mL\ (g\ h)^{-1}$ .

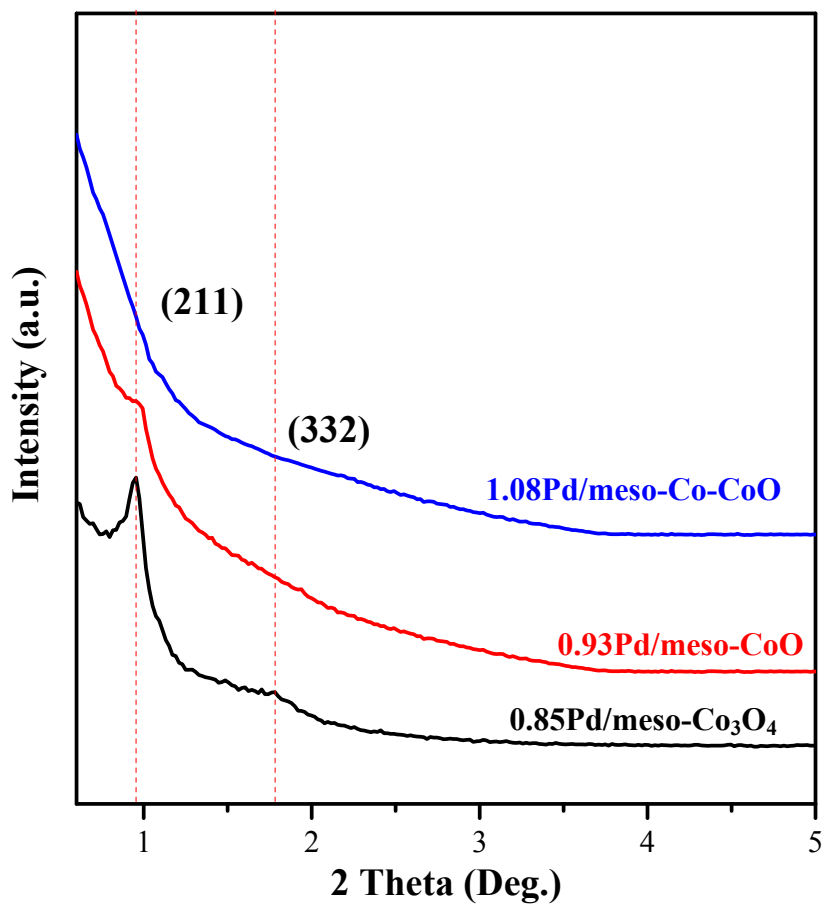

**Fig. S2** Low-angle XRD patterns of the samples.

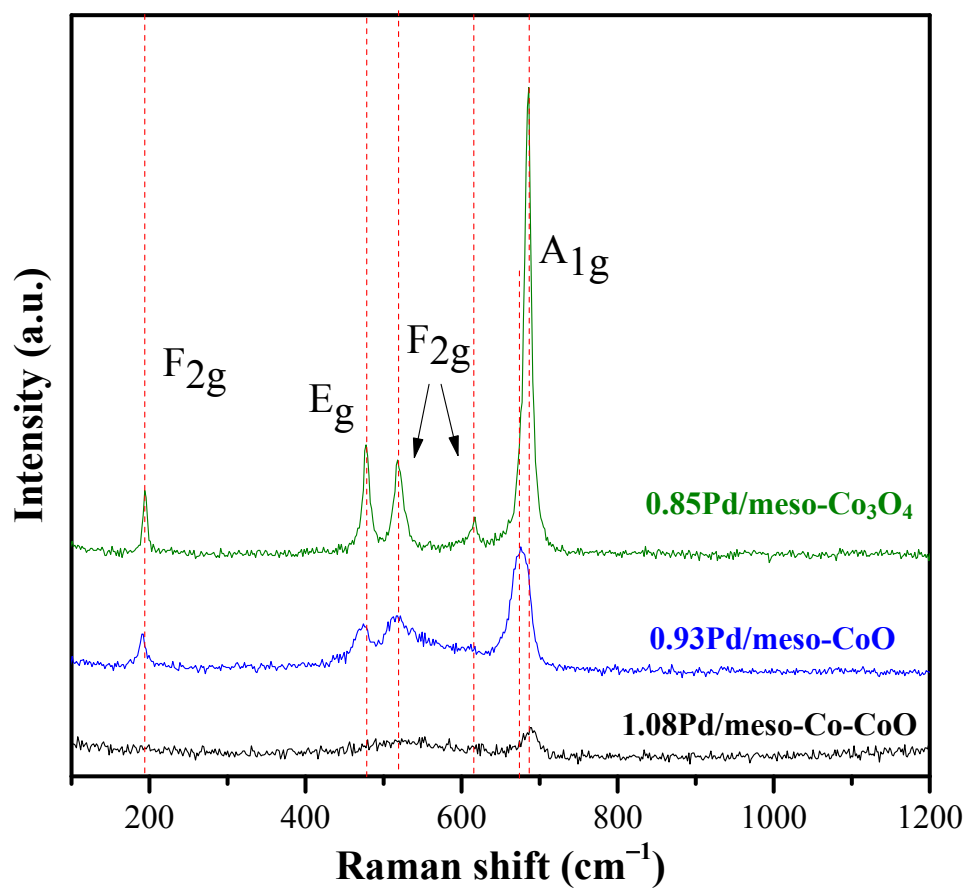

**Fig. S3** Raman spectra of the samples.



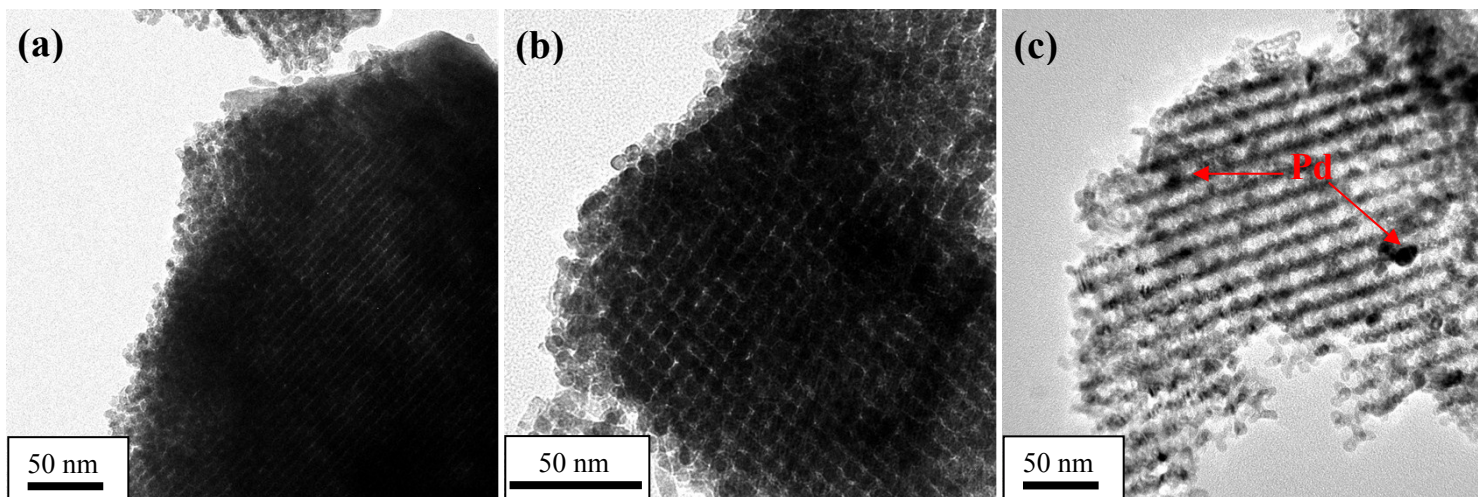

**Fig. S4** TEM images of (a) 0.85Pd/meso-Co<sub>3</sub>O<sub>4</sub>, (b) 0.93Pd/meso-CoO, and (c) 1.08Pd/meso-Co-CoO.

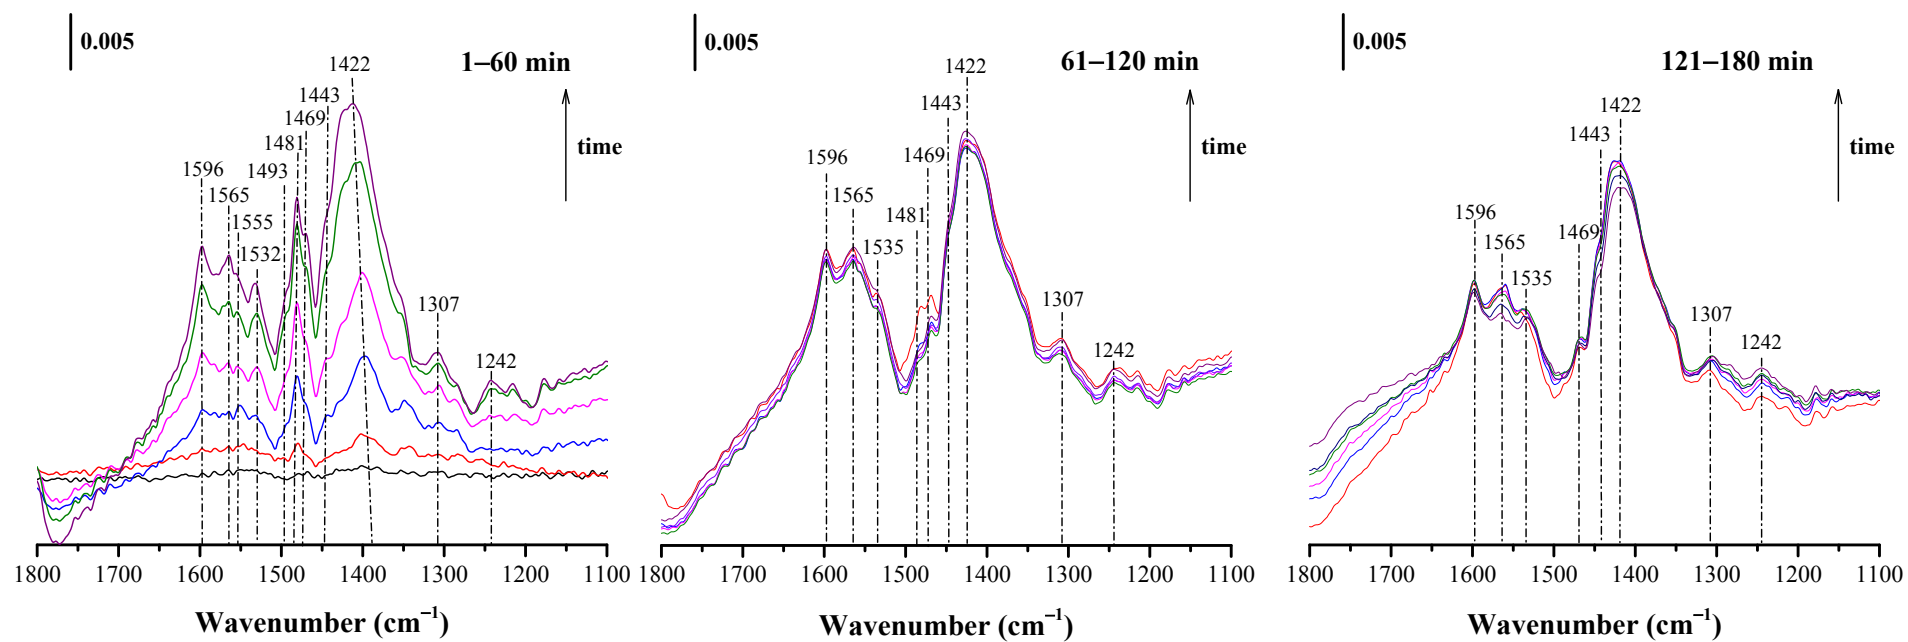

**Fig. S5** *In situ* DRIFTS spectra of adsorbed intermediates on the 0.85Pd/meso-Co<sub>3</sub>O<sub>4</sub> sample in the flow of 1000 ppm benzene + N<sub>2</sub> (in the range of 1–60 min), N<sub>2</sub> (in the range of 61–120 min), and 20 vol% O<sub>2</sub> + N<sub>2</sub> (in the range of 121–180 min) at 150 °C, respectively.

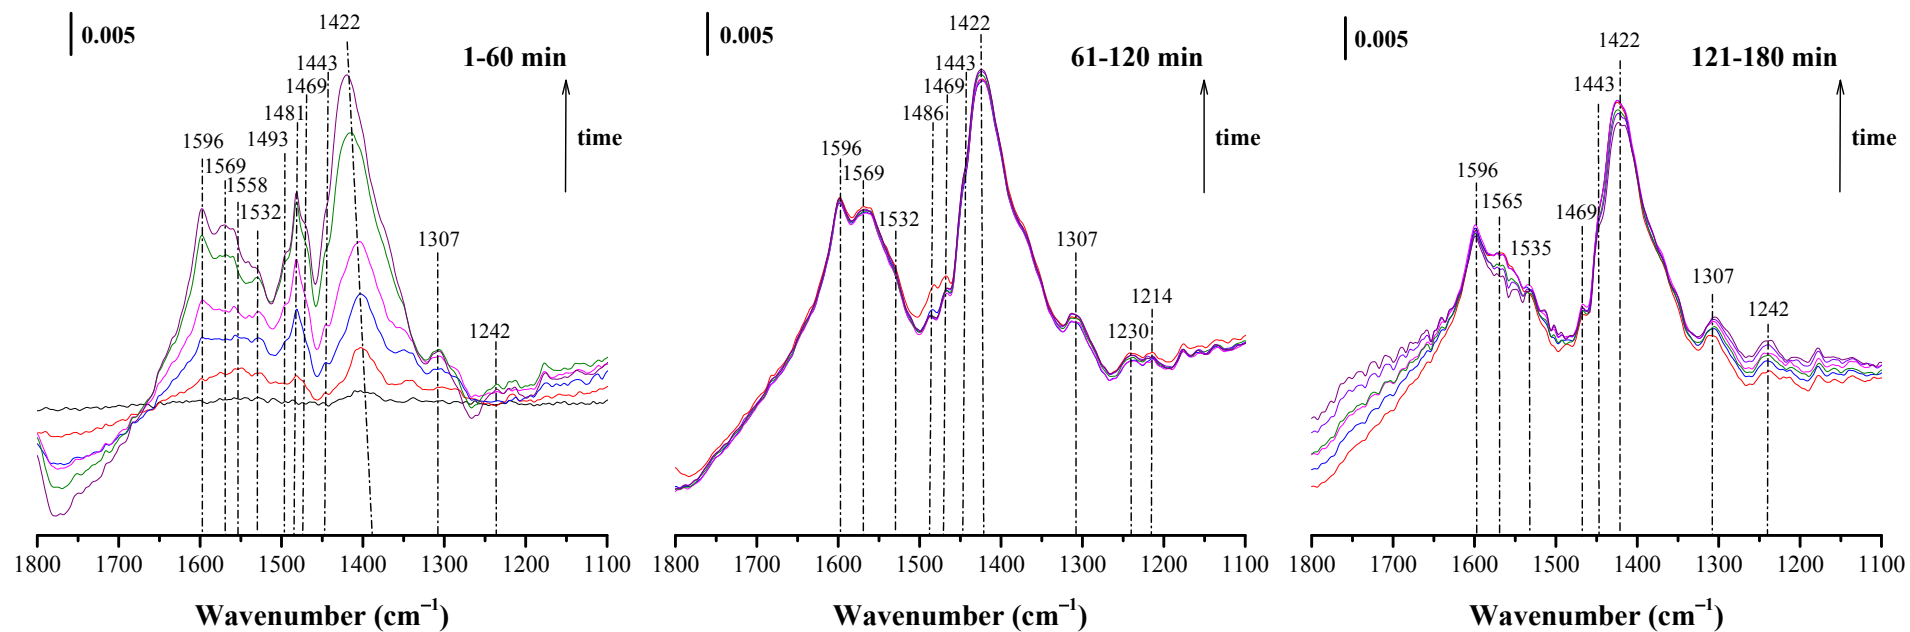

**Fig. S6** *In situ* DRIFTS spectra of adsorbed intermediates on the 0.93Pd/meso-CoO sample in the flow of 1000 ppm benzene + N<sub>2</sub> (in the range of 1–60 min), N<sub>2</sub> (in the range of 61–120 min), and 20 vol% O<sub>2</sub> + N<sub>2</sub> (in the range of 121–180 min) at 150 °C, respectively.

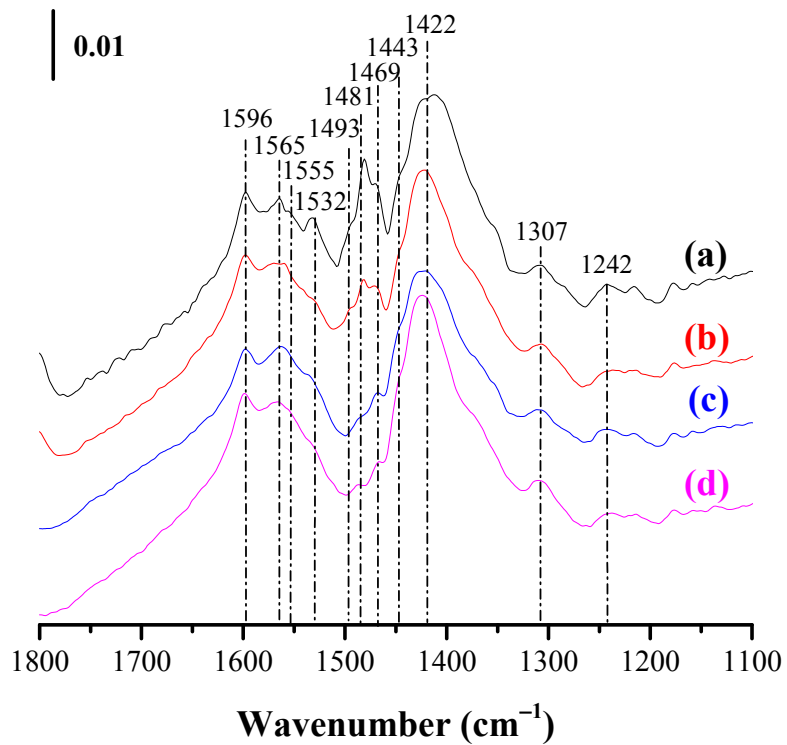

**Fig. S7** *In situ* DRIFTS spectra of (a, c) 0.85Pd/meso-Co<sub>3</sub>O<sub>4</sub> and (b, d) 0.93Pd/meso-CoO after adsorption of 1000 ppm benzene at 150 °C for 1 h and N<sub>2</sub> purging for 1 h.

**Table S1** Catalytic activities for benzene oxidation over the catalysts reported in this work and the literature

| Catalyst                                   | Reaction condition                                                               | Space velocity<br>(mL (g h) <sup>-1</sup> ) | $T_{90\%}$<br>(°C) | Benzene oxidation at 160 °C                                       |                                                                                       | Ref.      |
|--------------------------------------------|----------------------------------------------------------------------------------|---------------------------------------------|--------------------|-------------------------------------------------------------------|---------------------------------------------------------------------------------------|-----------|
|                                            |                                                                                  |                                             |                    | TOF <sub>noble metal</sub><br>( $\times 10^{-3} \text{ s}^{-1}$ ) | Specific reaction rate<br>( $\mu\text{mol (g}_{\text{noble metal}} \text{ s})^{-1}$ ) |           |
| 0.85Pd/meso-Co <sub>3</sub> O <sub>4</sub> | 1000 ppm C <sub>6</sub> H <sub>6</sub> + air (balance)                           | 40,000                                      | 214                | 0.62                                                              | 5.85                                                                                  | This work |
| 0.93Pd/meso-CoO                            | 1000 ppm C <sub>6</sub> H <sub>6</sub> + air (balance)                           | 40,000                                      | 189                | 1.46                                                              | 13.74                                                                                 | This work |
| 1.08Pd/meso-Co-CoO                         | 1000 ppm C <sub>6</sub> H <sub>6</sub> + air (balance)                           | 40,000                                      | 275                | 0.07                                                              | 0.62                                                                                  | This work |
| K/Ag-OMS-40                                | 1500 ppm C <sub>6</sub> H <sub>6</sub> + air (balance)                           | 90,000                                      | 218                | 1.28                                                              | 11.90                                                                                 | [5]       |
| 1.0Pd/Al <sub>2</sub> O <sub>3</sub>       | 1500 ppm C <sub>6</sub> H <sub>6</sub> + air (balance)                           | 90,000                                      | 206                | 2.72                                                              | 24.37                                                                                 | [5]       |
| Ru-5Co/TiO <sub>2</sub>                    | 500 ppm C <sub>6</sub> H <sub>6</sub> + 20 vol% O <sub>2</sub> + Ar<br>(balance) | 60,000                                      | 215                | 0.03                                                              | 0.34                                                                                  | [43]      |
| 6.5Au/meso-Co <sub>3</sub> O <sub>4</sub>  | 1000 ppm C <sub>6</sub> H <sub>6</sub> + air (balance)                           | 20,000                                      | 189                | 0.33                                                              | 1.68                                                                                  | [31]      |
| 0.53Pd/Co <sub>3</sub> O <sub>4</sub>      | 100 ppm C <sub>6</sub> H <sub>6</sub> + air (balance)                            | 60,000                                      | 221                | 0.30                                                              | 2.82                                                                                  | [32]      |

**Table S2** Assignments of the DRIFTS bands of the samples

| Wavenumber (cm <sup>-1</sup> ) | Vibrational mode                                 | Species          | Ref.       |
|--------------------------------|--------------------------------------------------|------------------|------------|
| 3002–3129                      | Phenylic C–H vibration                           | Gaseous benzene  | [13]       |
| 1700–2000                      | Overtone                                         | Gaseous benzene  | [13]       |
| 1596                           | C–O antisymmetric vibration                      | Formate          | [40]       |
| 1555–1565                      | C–O antisymmetric vibration                      | Acetate          | [12,41,42] |
| 1532                           | Superposition of the maleate and acetate species | Maleate, acetate | [42–44]    |
| 1481–1493                      | Skeletal C–C vibration                           | Aromatic ring    | [40,44,45] |
| 1469                           | C–H deformation vibration                        | Aromatic ring    | [40,44,45] |
| 1443                           | Skeletal C–C vibration                           | Aromatic ring    | [40,44,45] |
| 1400–1422                      | C–O symmetric vibration                          | Acetate          | [12,42]    |
| 1307                           | C–H deformation vibration                        | Maleate          | [42–44]    |
| 1242                           | –                                                | Phenolate        | [42]       |
| 600–1100                       | Phenylic C–H vibration                           | Gaseous benzene  | [13]       |
